# Supplementary material for: Modified Sick Neonatal Score (MSNS): A Novel Neonatal Disease Severity Scoring System for Resource-Limited Settings
Source: Crit Care Res Pract. 2019 May 9;2019:9059073. doi: 10.1155/2019/9059073 (PMC6532318; doi:10.1155/2019/9059073)
Supplement: Supplementary Materials — Data of the cases included in the study are entered in excel sheet. Coding of data are as follows: sex: 1-male, 2-female; inborn/outborn: 1-inborn, 2-outborn; outcome: 1-discharged, 2-expired; gestational age: 0-preterm, 1-term; diagnosis: 1-neonatal hyperbilirubinemia, 2-sepsis meningitis pneumonia, 3-respiratory distress syndrome, 4-birth asphyxia, 5-others; delivery mode: 1-vaginal, 2-caesarean, 3-vacuum/forceps assisted; scores for each of the 8 individual parameters-0, 1, or 2; total score maximum of 16. [file 9059073.f1.xls]

## Sheet: data msns scoring
Hospno	Age	Sex	inbornoutborn	Respscore	Heartscore	Axtemoscore	CRTscore	GRBScore	SPO2score	Gestagescore	Birthwtscore	Totalscore	Outcome	Gestage	diagnosis	deliverymode
1700832	1	1	1	2	0	0	2	2	1	2	1	10	1	1	1	0
1613788	1	1	1	1	2	2	2	2	1	2	1	13	1	1	1	0
1703583	1	1	1	2	1	1	1	1	1	2	1	10	1	1	1	0
1702373	1	2	1	2	2	1	2	1	1	1	0	10	1	0	1	0
1794781	1	1	1	1	2	1	2	2	2	1	0	11	1	0	1	1
20170242	1	1	1	2	2	1	2	2	2	1	1	13	1	0	1	0
1601236	1	1	1	2	1	2	0	1	2	1	0	9	1	0	1	1
1613492	1	1	1	0	2	1	1	2	2	1	1	10	1	0	1	0
1702088	1	1	1	2	2	1	2	2	2	2	2	15	1	1	1	0
1702113	1	1	1	2	2	2	2	2	2	2	2	16	1	1	1	0
1702239	1	1	1	2	2	1	2	2	2	2	1	14	1	1	1	1
1701527	1	1	1	2	2	1	2	2	2	2	2	15	1	1	1	0
1704365	1	1	1	2	2	1	2	2	2	2	2	15	1	1	1	0
1704577	1	1	1	2	2	2	2	2	2	2	2	16	1	1	1	0
1703832	1	1	1	2	2	0	2	2	2	2	2	14	1	1	1	0
1704689	1	1	1	2	2	2	2	2	2	2	2	16	1	1	1	0
1704340	1	1	1	2	2	1	2	2	2	2	2	15	1	3	1	0
1704309	1	1	1	1	2	1	2	2	2	2	1	13	1	1	1	0
1603428	1	1	1	1	1	1	2	2	2	2	2	13	1	1	1	1
1614341	1	1	1	2	2	1	2	2	2	2	2	15	1	1	1	3
1602208	1	1	1	2	2	1	2	2	2	2	1	14	1	1	1	3
1605185	1	1	1	1	2	1	2	2	2	2	2	14	1	1	1	0
1702360	1	1	1	2	2	1	2	2	2	2	2	15	1	1	1	0
1702280	1	1	1	2	2	1	2	2	2	2	2	15	1	3	1	1
1704376	1	1	1	2	2	1	2	2	2	2	2	15	1	1	1	0
1703952	1	1	1	2	2	2	2	2	2	2	2	16	1	1	1	0
1704090	1	1	1	2	2	1	2	2	2	2	2	15	1	1	1	0
1700978	1	1	1	2	2	2	2	2	2	2	1	15	1	1	1	0
1700947	1	1	1	1	2	1	2	2	2	2	1	13	1	1	1	0
1702313	1	1	1	1	1	1	2	2	2	2	2	13	1	1	1	0
201802155	1	1	1	2	2	2	2	2	2	2	1	15	1	1	1	0
1701153	1	2	1	2	2	1	2	2	2	1	2	14	1	0	1	0
1702598	1	2	1	2	2	1	2	1	2	1	0	11	1	0	1	0
1702474	1	2	1	2	2	1	2	2	2	1	2	14	1	0	1	0
1702599	1	2	1	2	2	1	2	2	2	1	1	13	1	0	1	1
1702104	1	2	1	2	2	1	2	2	2	1	2	14	1	0	1	0
1701935	1	2	1	2	2	1	2	2	2	1	1	13	1	0	1	1
1702067	1	2	1	2	2	1	2	2	2	1	1	13	1	0	1	0
1702068	1	2	1	2	2	1	2	2	2	1	1	13	1	0	1	1
1701352	1	2	1	2	2	1	2	1	2	1	1	12	1	0	1	0
1701231	1	2	1	2	2	1	2	1	2	1	1	12	1	0	1	0
1701108	1	2	1	1	2	1	2	2	2	1	0	11	1	0	1	0
1700716	1	2	1	2	2	1	2	2	2	0	0	11	1	0	1	1
1702318	1	2	1	2	2	1	2	2	2	1	1	13	1	0	1	0
1702264	1	2	1	2	2	1	2	2	2	2	1	14	1	1	1	0
1703217	1	2	1	2	2	0	2	2	2	2	2	14	1	1	1	0
1702660	1	2	1	2	2	1	2	2	2	2	1	13	1	1	1	0
1702280	1	2	1	2	2	1	2	2	2	2	2	15	1	1	1	0
1701468	1	2	1	2	2	2	2	2	2	2	2	16	1	1	1	0
1701460	1	2	1	2	2	1	2	2	2	2	2	15	1	1	1	0
1701517	1	2	1	2	2	2	2	2	2	2	2	16	1	1	1	0
1701111	1	2	1	2	2	2	2	2	2	2	2	16	1	1	1	3
1701369	1	2	1	2	2	1	2	1	2	2	2	14	1	1	1	1
1701337	1	2	1	2	2	2	2	2	2	2	2	16	1	1	1	3
1701341	1	2	1	2	2	2	2	2	2	2	2	16	1	1	1	0
1701461	1	2	1	2	2	1	2	1	2	2	1	13	1	1	1	0
1702258	1	2	1	2	2	1	2	2	2	2	1	14	1	1	1	0
1701572	1	2	1	2	2	2	2	1	2	2	2	15	1	1	1	1
1702590	1	2	1	1	2	1	2	2	2	2	2	15	1	1	1	0
1702045	1	2	1	2	2	0	2	2	2	2	1	13	1	1	1	0
1701952	1	2	1	2	2	1	2	2	2	2	2	15	1	1	1	0
1701769	1	2	1	2	2	1	2	2	2	2	2	15	1	1	1	0
1701658	1	2	1	2	2	1	2	2	2	2	2	15	1	1	1	0
1702056	1	2	1	2	2	1	2	2	2	2	1	14	1	1	1	0
1702309	1	2	1	2	2	2	2	2	2	2	2	16	1	1	1	0
1702300	1	2	1	2	2	2	2	2	2	2	1	15	1	1	1	0
1702604	1	2	1	2	2	1	2	1	2	2	2	14	1	1	1	3
1704063	1	2	1	2	2	1	2	2	2	2	2	15	1	1	1	0
1703548	1	2	1	2	2	1	2	2	2	2	1	14	1	1	1	1
1703390	1	2	1	2	2	1	2	2	2	2	2	15	1	1	1	1
1704498	1	2	1	2	2	1	2	2	2	2	1	14	1	1	1	0
1703643	1	2	1	2	2	1	2	2	2	2	2	15	1	1	1	0
1704299	1	2	1	2	2	1	2	2	2	2	2	15	1	1	1	1
1704270	1	2	1	2	2	2	2	2	2	2	2	16	1	1	1	0
1602076	1	2	1	2	2	2	2	2	2	2	2	16	1	1	1	0
1602367	1	2	1	2	2	2	2	2	2	2	1	15	1	1	1	0
1700510	1	2	1	2	2	2	2	2	2	2	2	16	1	1	1	0
1701047	1	2	1	2	2	2	2	2	2	2	2	16	1	1	1	0
1718112	1	2	1	2	2	1	2	2	2	2	1	14	1	1	1	0
1718139	1	2	1	2	2	1	2	2	2	2	2	15	1	1	1	0
1701234	1	2	1	2	2	1	2	1	2	2	1	13	1	1	1	0
1702052	1	2	1	2	1	2	2	2	2	2	2	15	1	1	1	1
1701341	1	2	1	2	2	2	2	1	2	2	2	15	1	1	1	0
1702600	1	2	1	2	2	1	2	2	2	2	2	15	1	1	1	1
201804157	1	2	1	2	2	2	2	2	2	2	1	15	1	1	1	0
20182176	1	2	1	2	2	2	2	2	2	2	1	14	1	1	1	1
201800901	1	2	1	1	2	2	2	1	2	2	2	14	1	1	1	0
20170202	1	2	1	2	2	2	2	2	2	2	2	15	1	1	1	0
201800756	1	2	1	1	2	2	2	2	2	2	2	15	1	1	1	0
20183991	1	2	1	2	1	1	2	2	2	2	2	14	1	1	1	0
201724293	1	2	1	2	2	1	2	2	2	1	1	13	1	0	1	0
1701472	1	1	2	2	2	1	2	2	2	1	2	14	1	0	1	0
1701270	1	1	2	2	2	2	2	2	2	1	1	14	1	0	1	0
1702544	1	1	2	1	2	1	2	2	2	1	1	12	1	0	1	0
1702615	1	1	2	2	2	1	2	2	2	1	1	13	1	0	1	0
1701070	1	1	2	2	2	1	2	2	2	1	1	13	1	0	1	0
20181814	1	1	2	2	2	2	2	1	2	1	0	12	1	0	1	0
201830123	1	1	2	2	2	1	1	2	2	1	0	11	1	0	1	0
1702337	1	1	2	2	1	0	1	2	2	2	2	12	1	1	1	1
2017250	1	1	2	2	1	1	1	1	2	2	1	11	1	1	1	0
1612806	1	2	2	2	2	1	2	2	2	1	1	13	1	0	1	0
1604153	1	2	2	2	2	1	2	2	2	1	1	13	1	0	1	0
1701137	3	2	2	2	1	2	2	2	2	2	1	15	1	1	1	1
1701486	4	2	2	2	2	2	2	2	2	2	2	16	1	1	1	0
1702546	2	2	2	2	2	1	2	2	2	2	1	14	1	1	1	0
1701327	5	2	2	2	2	1	2	1	2	2	2	14	1	1	1	0
1702397	6	2	2	2	2	2	2	2	2	2	2	16	1	1	1	0
1704003	2	2	2	2	2	1	2	2	2	2	2	15	1	1	1	0
1704669	8	2	2	2	2	1	2	2	2	2	2	15	1	1	1	0
1702857	3	2	2	2	2	1	2	2	2	2	2	15	1	1	1	0
1703700	4	2	2	2	2	2	2	2	2	2	2	16	1	1	1	0
1703571	6	2	2	1	2	0	2	2	2	2	1	12	1	1	1	0
1704285	4	2	2	2	2	2	2	2	2	2	2	16	1	1	1	1
1704582	4	2	2	2	2	1	2	2	2	2	2	15	1	1	1	0
1704020	4	2	2	2	2	0	2	2	2	2	1	13	1	1	1	0
2017063	1	2	2	2	2	2	2	2	2	1	0	13	1	0	1	0
2017137	1	2	2	2	2	2	2	1	2	1	1	13	1	0	1	3
2017045	4	2	2	2	2	1	2	2	2	1	1	13	1	0	1	1
2017053	3	2	2	2	2	2	2	2	2	1	1	14	1	0	1	0
1602389	2	2	2	2	2	2	2	2	2	1	2	15	1	0	1	0
1704294	1	1	1	0	0	0	2	2	0	1	2	7	1	0	2	0
201809162	1	2	1	1	1	2	2	2	0	2	2	12	1	1	2	0
2017319	1	1	1	0	2	1	2	2	0	0	0	7	1	0	2	0
1701983	1	2	1	2	2	1	2	2	0	2	2	13	1	1	2	0
201831129	1	2	1	0	2	2	1	1	0	2	2	10	1	1	2	0
1701270	1	1	1	0	2	1	1	2	0	0	0	6	2	0	2	0
1704560	1	1	1	0	0	1	1	2	0	0	0	4	2	0	2	0
1703096	1	1	1	0	1	1	2	2	0	0	0	6	2	0	2	0
2017184	1	1	1	0	0	0	1	2	0	0	1	4	2	0	2	1
1602782	1	1	1	0	0	1	0	2	0	2	2	7	2	1	2	1
1613269	1	1	1	0	0	0	1	2	0	2	2	7	2	1	2	3
1601297	1	1	1	0	1	1	2	2	0	2	2	10	2	1	2	0
2017065	1	2	1	0	1	0	0	2	0	2	1	6	2	1	2	0
1718055	1	2	1	0	1	0	0	2	0	2	1	6	2	1	2	1
1701875	1	2	1	2	2	1	1	2	0	1	0	9	2	0	2	0
201812165	1	1	1	0	0	0	0	2	0	1	0	3	2	0	2	0
20181845	1	1	1	1	0	0	1	2	0	1	0	5	2	0	2	0
20180303	1	2	1	0	2	0	0	2	0	2	1	7	2	1	2	0
1700894	1	2	1	2	2	1	2	2	0	2	1	13	2	1	2	1
1701765	1	2	1	1	1	0	1	2	0	2	2	9	2	1	2	0
20175453	7	1	2	0	2	1	2	2	0	2	2	11	1	1	2	0
2017064	2	1	2	2	0	2	2	0	0	0	0	6	2	0	2	0
1700243	1	1	2	0	0	2	1	2	0	1	0	6	2	0	2	0
1702411	1	1	2	0	0	1	1	2	0	1	1	6	2	0	2	0
2017118	1	1	2	0	2	0	1	0	0	1	1	5	2	0	2	0
2017255	1	1	2	0	1	0	0	2	0	0	0	3	2	0	2	1
2017138	1	1	2	2	2	1	1	1	0	1	2	10	2	0	2	0
1701875	1	2	2	2	2	1	1	2	0	1	0	9	2	0	2	0
1701873	1	2	2	2	2	1	1	2	0	1	0	9	2	0	2	1
1701490	1	1	1	0	2	1	2	2	1	2	1	11	1	3	2	0
1703512	1	1	1	0	0	0	1	2	1	2	1	7	1	1	2	0
1704491	1	1	1	0	2	2	1	2	1	2	1	11	1	1	2	0
1602180	1	1	1	1	2	1	1	2	1	1	1	10	1	0	2	0
2017246	1	1	1	0	2	1	1	2	1	1	1	9	1	0	2	0
2017209	1	1	1	0	2	1	2	2	1	1	1	10	1	0	2	0
1700196	1	1	1	1	2	2	2	2	1	1	1	12	1	0	2	1
1702607	1	1	1	1	1	2	2	1	1	1	1	13	1	0	2	0
1702429	1	1	1	2	2	1	2	2	1	2	2	14	1	1	2	0
1703217	1	1	1	2	1	2	2	1	1	2	2	13	1	1	2	1
1700205	1	1	1	2	2	1	2	2	1	2	2	14	1	1	2	3
1701633	1	2	1	1	2	2	2	1	1	2	1	13	1	1	2	0
1616876	1	2	1	0	2	1	2	2	1	2	2	12	1	1	2	0
1602198	1	2	1	1	1	1	2	1	1	2	2	11	1	1	2	1
1700199	1	2	1	1	1	1	2	1	1	2	2	11	1	1	2	0
1702317	1	1	1	2	0	0	1	1	1	2	2	9	2	1	2	3
2017197	1	1	1	1	0	1	1	1	1	2	1	8	2	1	2	0
20183587	1	2	1	0	2	1	1	2	1	1	1	9	2	0	2	1
1613032	1	2	1	0	1	1	2	2	1	2	2	11	2	1	2	0
1604041	1	2	1	0	2	0	1	2	1	2	2	10	2	1	2	0
1602209	1	1	1	1	2	1	2	2	1	2	1	12	2	1	2	0
1604275	1	1	1	2	2	1	2	2	1	2	1	13	2	1	2	0
1701003	1	2	1	2	2	2	2	2	1	2	1	14	2	1	2	0
1703919	4	2	2	0	2	0	1	2	1	2	2	10	1	1	2	0
1701238	1	1	2	2	2	0	2	2	1	1	0	10	1	0	2	0
1701520	10	1	2	0	2	1	2	2	1	2	2	12	1	1	2	0
1701154	1	1	2	0	0	0	1	2	1	0	0	4	2	0	2	0
1700947	1	1	2	0	0	1	2	2	1	0	0	6	2	0	2	0
1700946	1	1	2	0	0	1	1	2	1	0	0	5	2	0	2	0
1602243	1	1	2	0	2	1	2	2	1	0	0	8	2	0	2	0
1603788	1	1	2	0	2	1	1	1	1	0	0	6	2	0	2	0
1603879	1	1	2	0	2	1	2	1	1	0	0	7	2	0	2	0
2017130	1	2	2	2	1	1	1	2	1	0	0	8	2	0	2	0
20174482	1	2	2	1	2	1	1	1	1	0	0	7	2	0	2	0
1701139	1	1	1	0	2	1	2	2	2	2	2	13	1	1	2	1
1701429	1	1	1	1	2	1	2	2	2	0	1	11	1	0	2	1
2017079	1	1	1	0	1	2	2	1	2	1	2	11	1	0	2	0
2017216	1	1	1	2	2	1	2	2	2	1	1	13	1	0	2	0
2017238	1	1	1	2	2	1	2	2	2	1	0	12	1	0	2	0
2017196	1	1	1	1	2	2	2	2	2	1	1	13	1	0	2	0
2017241	1	1	1	2	2	2	2	1	2	1	1	13	1	0	2	0
2017173	1	1	1	2	2	1	1	2	2	1	2	13	1	0	2	0
20174718	1	1	1	1	2	1	2	2	2	1	0	11	1	0	2	0
20175334	1	1	1	2	2	1	2	2	2	1	1	13	1	0	2	1
20175265	1	1	1	1	2	1	2	2	2	1	1	12	1	0	2	0
1702602	1	1	1	1	1	2	2	1	2	1	2	12	1	0	2	1
1700201	1	1	1	1	2	1	2	2	2	0	1	11	1	0	2	0
1794721	1	1	1	1	2	1	2	2	2	1	0	11	1	0	2	0
1702836	1	1	1	2	2	2	2	2	2	2	2	16	1	1	2	0
1701732	1	1	1	2	2	2	2	2	2	2	2	16	1	1	2	0
1702563	1	1	1	2	2	2	2	2	2	2	2	16	1	1	2	0
1701282	1	1	1	2	2	2	2	2	2	2	1	15	1	1	2	0
1701099	1	1	1	2	2	1	2	2	2	2	2	15	1	1	2	0
1700375	1	1	1	2	2	1	2	2	2	2	2	15	1	1	2	0
1701138	1	1	1	2	2	1	2	2	2	2	2	15	1	1	2	1
1700973	1	1	1	2	2	1	2	2	2	2	1	14	1	1	2	0
1701021	1	1	1	2	2	1	2	1	2	2	2	14	1	1	2	0
1701015	1	1	1	2	2	1	2	1	2	2	2	14	1	1	2	0
1702078	1	1	1	2	2	2	2	2	2	2	2	16	1	1	2	1
1702080	1	1	1	2	2	1	2	2	2	2	2	15	1	1	2	3
1702323	1	1	1	2	2	1	2	2	2	2	2	15	1	1	2	0
1702304	1	1	1	2	2	0	2	2	2	2	2	14	1	1	2	1
1762275	1	1	1	2	2	2	2	2	2	2	1	15	1	1	2	0
1704533	1	1	1	2	2	1	2	2	2	2	2	15	1	1	2	1
170450	1	1	1	2	2	1	2	2	2	2	2	15	1	1	2	0
1604368	1	1	1	0	2	2	2	2	2	2	2	14	1	1	2	0
1700973	1	1	1	2	2	2	2	2	2	2	1	15	1	1	2	0
1701138	1	1	1	0	2	1	2	2	2	2	2	13	1	1	2	0
1700943	1	1	1	1	2	1	2	2	2	2	1	13	1	1	2	0
1702318	1	1	1	1	1	1	2	2	2	2	2	13	1	1	2	0
1700103	1	1	1	2	2	1	2	2	2	2	2	15	1	1	2	0
1700264	1	1	1	2	2	1	2	2	2	2	2	15	1	1	2	1
1702183	1	1	1	2	2	1	2	2	2	2	2	15	1	1	2	0
1702248	1	1	1	2	2	1	2	2	2	2	2	15	1	1	2	0
1701232	1	1	1	2	2	1	2	2	2	2	2	15	1	1	2	0
1704369	1	1	1	0	2	2	2	2	2	2	2	14	1	1	2	0
1703423	1	1	1	1	1	1	2	2	2	2	2	13	1	1	2	0
20189320	1	1	1	2	2	1	2	2	2	2	1	14	1	1	2	3
1702344	1	2	1	2	2	1	2	2	2	1	2	14	1	0	2	0
1702349	1	2	1	2	2	1	2	2	2	1	1	13	1	0	2	1
1718119	1	2	1	2	2	2	2	2	2	1	2	15	1	0	2	0
201830183	1	2	1	2	2	1	2	2	2	1	1	13	1	0	2	1
1702360	1	2	1	2	2	2	2	2	2	2	2	16	1	1	2	0
1702693	1	2	1	2	2	2	2	2	2	2	2	16	1	1	2	0
1704130	1	2	1	2	2	2	2	2	2	2	2	16	1	1	2	1
1702036	1	2	1	2	2	1	2	2	2	2	2	15	1	1	2	0
1701498	1	2	1	0	2	1	2	2	2	2	2	13	1	1	2	0
20175218	1	2	1	2	2	2	2	1	2	2	2	15	1	1	2	0
1702889	1	2	1	2	2	2	2	2	2	2	1	15	1	1	2	0
1602139	1	2	1	2	2	1	2	2	2	2	2	15	1	1	2	0
1602107	1	2	1	2	2	1	2	2	2	2	2	15	1	1	2	0
1602376	1	2	1	2	2	2	2	2	2	2	2	16	1	1	2	0
1602459	1	2	1	0	2	2	2	2	2	2	2	14	1	1	2	0
1604373	1	2	1	2	2	2	2	2	2	2	2	16	1	1	2	0
1614130	1	2	1	2	2	1	2	2	2	2	2	15	1	1	2	1
1601898	1	2	1	2	1	1	2	2	2	2	1	13	1	1	2	3
1701035	1	2	1	1	2	1	2	2	2	2	2	14	1	1	2	0
1702342	1	2	1	2	2	1	2	2	2	2	2	15	1	1	2	1
1703101	1	2	1	0	1	1	1	2	2	2	2	11	1	1	2	0
1711892	1	2	1	2	1	1	2	2	2	2	1	13	1	1	2	0
20181811	1	2	1	2	2	2	2	2	2	2	1	15	1	1	2	0
20184785	1	2	1	1	2	1	2	2	2	2	1	13	1	1	2	0
201810163	1	2	1	0	2	1	2	2	2	2	2	13	1	1	2	0
201823176	1	2	1	1	1	2	2	2	2	2	2	14	1	1	2	0
201832185	1	2	1	2	2	2	2	2	2	2	1	15	1	1	2	0
201828181	1	2	1	2	2	2	2	2	2	2	2	16	1	1	2	0
2018122	1	2	1	2	2	1	2	2	2	2	2	15	1	1	2	1
20186743	1	2	1	2	2	2	2	1	2	2	2	15	1	1	2	0
20182931	1	2	1	2	2	2	2	2	2	2	2	16	1	1	2	0
201725252	1	2	1	2	2	2	2	2	2	2	2	16	1	1	2	0
20172626	1	2	1	1	2	2	2	2	2	2	2	15	1	1	2	1
1718091	1	2	1	2	2	1	2	2	2	0	1	12	1	0	2	0
20180010	1	2	1	2	2	1	2	2	2	1	1	13	1	0	2	0
1718059	1	1	1	2	2	0	1	2	2	0	0	9	2	0	2	0
1613426	1	1	1	2	2	1	1	2	2	2	1	13	2	1	2	0
1613849	1	1	1	0	2	1	2	2	2	2	2	13	2	1	2	0
1602178	1	1	1	2	2	1	2	2	2	2	2	15	2	1	2	0
20180636	1	2	1	1	1	1	2	2	2	0	0	9	2	0	2	0
1700906	1	2	1	2	2	2	2	2	2	2	1	15	2	1	2	1
20180637	1	2	1	2	2	2	2	2	2	2	1	15	2	1	2	3
1701626	1	2	1	1	2	1	2	2	2	2	1	13	2	1	2	0
1701626	1	2	1	0	2	1	1	2	2	2	1	11	2	1	2	0
1702052	2	1	2	2	2	1	2	2	2	1	1	13	1	0	2	3
1701600	3	1	2	2	2	1	2	1	2	1	1	12	1	0	2	3
1702340	1	1	2	1	2	1	2	1	2	0	0	9	1	0	2	1
1702703	3	1	2	2	2	1	2	2	2	1	2	14	1	0	2	1
1702799	2	1	2	2	2	1	2	2	2	1	1	13	1	0	2	1
1701180	4	1	2	2	2	1	2	2	2	1	1	13	1	0	2	0
1702414	3	1	2	2	2	1	2	2	2	1	1	13	1	0	2	0
1702597	1	1	2	2	1	1	2	2	2	1	0	11	1	0	2	0
20170505	1	1	2	2	2	0	2	1	2	0	0	9	1	0	2	0
20172423	1	1	2	0	2	1	2	1	2	0	0	8	1	0	2	0
1702342	3	1	2	2	2	2	2	2	2	2	2	16	1	1	2	0
1702662	7	1	2	2	2	1	2	2	2	2	2	15	1	1	2	1
1703214	8	1	2	2	2	1	2	1	2	2	2	14	1	1	2	0
1701664	3	1	2	2	2	2	2	2	2	2	1	15	1	1	2	0
1701141	6	1	2	2	2	2	2	2	2	2	2	16	1	1	2	0
1701359	8	1	2	2	2	1	2	2	2	2	2	15	1	1	2	0
1701398	3	1	2	2	2	2	2	2	2	2	2	16	1	1	2	3
1702423	4	1	2	2	2	1	2	2	2	2	2	15	1	1	2	1
1702400	5	1	2	2	2	1	2	2	2	2	1	14	1	1	2	1
1702461	4	1	2	2	2	2	2	2	2	2	2	16	1	1	2	0
1701793	4	1	2	2	2	1	2	2	2	2	1	14	1	1	2	0
1702600	3	1	2	2	2	1	2	2	2	2	2	15	1	1	2	0
1702626	20	1	2	2	2	2	2	2	2	2	2	16	1	1	2	0
2017061	2	1	2	2	2	2	2	2	2	2	2	16	1	1	2	0
2017068	4	1	2	2	2	2	2	2	2	2	2	16	1	1	2	0
2017080	7	1	2	1	2	1	2	2	2	2	2	14	1	1	2	0
2017140	8	1	2	2	2	2	2	2	2	2	2	16	1	1	2	0
2017202	5	1	2	2	2	1	2	2	2	2	2	15	1	1	2	0
2017254	9	1	2	2	2	1	2	2	2	2	2	15	1	1	2	1
2017091	11	1	2	2	2	2	2	2	2	2	2	16	1	1	2	0
2017247	12	1	2	2	2	1	2	2	2	2	2	15	1	1	2	0
2017146	3	1	2	1	1	1	1	2	2	2	1	11	1	1	2	0
2017220	3	1	2	2	2	1	2	2	2	2	1	14	1	1	2	3
2017221	3	1	2	2	1	1	2	2	2	2	1	13	1	1	2	1
2017206	3	1	2	0	1	0	0	2	2	2	2	9	1	1	2	1
2017142	3	1	2	2	2	1	2	1	2	2	2	14	1	1	2	0
1613034	4	1	2	0	2	1	2	2	2	2	1	12	1	1	2	0
1600149	4	1	2	2	2	2	2	2	2	2	2	16	1	1	2	0
1604152	3	1	2	2	2	2	2	1	2	2	2	15	1	1	2	1
1701947	4	2	2	1	2	1	2	2	2	1	1	12	1	0	2	0
1614153	4	2	2	2	2	1	2	2	2	1	1	13	1	0	2	0
1703745	1	2	2	1	2	0	2	2	2	1	0	10	1	0	2	0
1702660	4	2	2	2	2	2	2	2	2	1	2	15	1	0	2	0
1704037	3	2	2	1	2	1	2	2	2	1	1	12	1	0	2	0
1704087	3	2	2	1	2	1	2	2	2	1	1	12	1	0	2	0
1703524	1	2	2	2	2	0	2	2	2	1	0	11	1	0	2	0
1709587	2	2	2	1	2	1	2	2	2	1	1	12	1	0	2	0
1701870	3	2	2	2	2	1	2	2	2	2	2	15	1	1	2	0
1701936	4	2	2	1	2	1	2	2	2	2	2	14	1	1	2	3
1702020	7	2	2	2	2	2	2	2	2	2	2	16	1	1	2	1
1701807	8	2	2	2	2	1	2	1	2	2	1	13	1	1	2	1
1701200	9	2	2	0	2	1	2	2	2	2	2	13	1	1	2	3
1701087	6	2	2	2	2	1	2	1	2	2	2	14	1	1	2	1
1701077	3	2	2	2	2	1	2	1	2	2	2	14	1	1	2	1
1701419	4	2	2	2	2	1	2	1	2	2	2	14	1	1	2	0
1700916	2	2	2	2	2	2	2	2	2	2	1	15	1	1	2	0
1701081	1	2	2	2	2	2	2	2	2	2	2	16	1	1	2	1
1701066	5	2	2	2	2	1	2	2	2	2	2	15	1	1	2	0
1701461	4	2	2	2	2	2	2	2	2	2	2	16	1	1	2	0
1129753	1	1	2	2	2	1	2	2	2	1	1	13	1	0	2	0
1702007	1	1	2	2	2	1	2	2	2	1	1	13	1	0	2	0
1704168	1	2	2	2	2	1	2	2	2	1	1	13	1	0	2	0
2017115	4	2	2	2	2	1	2	2	2	1	1	13	1	0	2	0
20170186	1	2	2	2	2	1	1	2	2	1	0	11	1	0	2	0
2017051	1	1	2	2	2	0	1	2	2	0	0	9	2	0	2	0
2017114	1	2	2	2	2	2	2	1	2	1	0	12	2	0	2	0
20172569	1	1	2	2	2	1	2	2	2	1	0	12	2	0	2	1
1718046	1	2	1	0	2	1	2	2	0	1	2	10	1	0	3	0
20170808	1	2	1	0	1	1	1	2	0	1	1	7	1	0	3	0
1604296	1	1	1	0	0	1	1	0	0	0	0	2	2	0	3	0
1603284	1	1	1	0	0	0	1	2	0	0	1	4	2	0	3	0
201805158	1	2	1	0	1	1	1	2	0	1	1	7	2	0	3	1
201808161	1	1	1	0	2	1	1	1	0	0	0	5	2	0	3	0
201816169	1	1	1	0	1	0	0	2	0	1	1	5	2	0	3	3
2017049	1	2	2	0	2	1	2	2	0	1	2	10	1	0	3	0
2017211	1	2	2	0	1	0	1	1	0	0	0	3	1	0	3	0
1701439	1	1	2	0	2	0	2	2	0	0	0	6	2	0	3	1
1610177	1	2	2	0	0	2	1	2	0	0	0	5	2	0	3	0
20173096	1	1	2	0	1	1	2	2	0	0	0	6	2	0	3	3
1601210	1	2	2	0	1	0	0	0	0	0	0	1	2	0	3	0
1701346	1	2	1	1	2	1	2	1	1	0	0	8	1	0	3	0
1701690	1	2	1	0	2	1	2	2	1	1	1	10	1	0	3	0
1718187	1	1	1	1	2	1	1	2	1	1	1	10	1	0	3	0
1701309	1	2	1	0	2	1	2	2	1	1	1	10	1	0	3	0
1702215	1	2	1	0	2	1	2	2	1	0	0	8	2	0	3	0
20181769	1	2	1	1	2	0	1	2	1	1	1	9	2	0	3	1
201806159	1	2	1	0	1	1	2	2	1	0	0	7	2	0	3	0
1701308	1	1	2	1	2	2	2	2	1	1	1	12	1	0	3	1
1700884	1	1	2	1	2	1	2	2	1	0	0	9	1	0	3	0
20175136	1	2	2	0	2	1	2	2	1	1	1	10	1	0	3	0
1610034	1	2	2	1	1	1	2	2	1	1	1	10	1	0	3	1
1614592	1	1	2	1	2	1	2	1	1	0	2	10	2	0	3	0
1702055	1	2	2	0	2	1	1	2	1	0	1	8	2	0	3	1
1701390	1	2	2	0	2	1	1	2	1	1	0	8	2	0	3	3
1611841	1	2	2	0	2	1	1	1	1	0	0	6	2	0	3	1
1611800	1	2	2	1	2	1	2	2	1	1	0	10	2	0	3	0
1613650	1	2	2	0	2	1	2	2	1	0	0	8	2	0	3	0
1613650	1	2	2	0	2	1	2	2	1	0	0	8	2	0	3	0
1704189	1	2	2	0	2	1	1	1	1	0	0	6	2	0	3	0
1703652	1	2	2	0	2	1	2	2	1	0	0	8	2	0	3	1
20173976	1	1	2	0	2	1	1	2	1	1	1	9	2	0	3	0
20175477	1	2	2	0	0	1	2	2	1	1	1	8	2	0	3	0
1603303	1	2	2	0	2	1	1	2	1	0	0	7	2	0	3	0
2017048	1	1	1	0	2	1	2	2	2	1	1	11	1	0	3	0
1700720	1	2	1	0	2	1	2	1	2	1	0	9	1	0	3	0
1718044	1	1	1	0	2	1	2	2	2	1	1	11	1	0	3	0
1718089	1	1	1	0	1	2	2	1	2	1	2	11	1	0	3	0
1702635	1	2	1	1	2	1	2	1	2	1	1	11	1	0	3	0
1700213	1	1	1	0	1	1	2	2	2	1	1	8	2	0	3	1
2017606	1	2	1	1	2	1	2	2	2	1	0	11	2	0	3	0
1602394	1	2	2	1	2	1	2	2	2	1	1	12	1	0	3	1
1609586	1	2	2	1	2	1	2	2	2	1	1	12	1	0	3	0
20173030	1	1	2	1	2	1	2	1	2	0	1	10	1	0	3	0
2017264	1	2	2	1	2	1	2	1	2	0	0	9	1	0	3	0
2017071	1	2	2	2	2	1	2	2	2	1	2	13	1	0	3	1
2017236	1	2	2	0	0	1	1	2	2	0	0	6	1	0	3	0
1603523	1	1	2	0	2	1	2	2	2	1	0	9	2	0	3	0
1613114	1	1	2	1	2	1	2	2	2	1	1	12	2	0	3	0
2017237	1	2	2	0	2	1	2	2	2	0	0	9	2	0	3	1
20171952	1	2	2	1	2	1	2	2	2	0	0	10	2	0	3	0
1612527	1	2	2	2	2	1	2	2	2	1	0	12	2	0	3	1
201822175	1	1	1	2	1	1	2	2	0	2	2	12	1	1	4	1
2017070	1	1	1	0	1	1	1	2	0	2	2	9	2	1	4	0
20172576	1	1	1	0	1	1	1	2	0	2	2	9	2	1	4	0
1701765	1	2	1	1	1	0	1	2	0	2	2	9	2	1	4	0
201826153	1	1	1	0	2	0	1	2	0	1	0	6	2	0	4	0
20182981	1	1	1	0	1	1	1	2	0	1	1	7	2	0	4	1
2017315	1	1	2	0	2	1	2	1	0	2	1	9	1	1	4	0
173789	1	1	1	1	2	2	2	2	1	2	1	13	1	1	4	1
201809102	1	1	1	2	1	2	2	2	1	2	1	13	1	1	4	0
201715326	1	2	1	1	1	1	2	2	1	1	0	9	1	0	4	0
20170707	1	1	1	2	0	2	2	2	1	0	0	7	2	0	4	0
20172828	1	1	2	1	2	1	2	2	1	2	2	13	1	1	4	0
1603731	1	2	2	0	1	1	1	1	1	1	1	7	2	0	4	0
1701154	1	1	2	0	0	0	1	2	1	0	0	4	2	0	4	0
1718116	1	2	1	2	2	1	2	2	2	1	1	13	1	0	4	0
1702509	1	1	1	2	2	1	2	2	2	1	1	13	1	0	4	0
1614476	1	1	1	0	1	1	2	2	2	1	1	10	1	0	4	0
1613200	1	1	1	1	2	1	2	2	2	0	1	11	1	0	4	1
1718213	1	1	1	2	2	1	2	2	2	1	1	13	1	0	4	0
1702451	1	1	1	2	2	1	2	2	2	2	2	15	1	1	4	0
1704342	1	1	1	2	2	1	2	2	2	2	2	15	1	1	4	0
1718142	1	1	1	2	2	2	2	2	2	2	2	16	1	1	4	1
1718205	1	1	1	2	2	1	2	2	2	2	2	15	1	1	4	0
1608089	1	1	1	1	2	0	1	2	2	2	2	12	1	1	4	0
201834187	1	1	1	0	2	1	1	2	2	2	2	12	1	1	4	1
20180456	1	1	1	2	2	2	2	2	2	2	1	15	1	1	4	0
20180658	1	1	1	2	2	0	2	1	2	2	2	13	1	1	4	0
20180557	1	1	1	2	2	2	2	2	2	2	2	16	1	1	4	1
20180648	1	1	1	1	1	2	1	1	2	2	2	12	1	1	4	0
1700759	1	2	1	2	2	2	2	2	2	1	1	14	1	0	4	0
1701009	1	2	1	2	2	2	2	2	2	1	1	14	1	0	4	0
1718073	1	2	1	2	2	1	2	2	2	1	2	13	1	0	4	0
1702607	1	2	1	2	2	2	2	2	2	2	1	15	1	1	4	0
1702572	1	2	1	2	2	1	2	2	2	2	2	15	1	1	4	0
1701444	1	2	1	2	2	1	2	2	2	2	2	15	1	1	4	0
1702608	1	2	1	2	2	1	2	2	2	2	2	15	1	1	4	0
1702635	1	2	1	2	2	2	2	2	2	2	2	16	1	1	4	0
1702128	1	2	1	2	2	2	2	2	2	2	2	16	1	1	4	1
1702460	1	2	1	2	2	1	2	2	2	2	1	14	1	1	4	0
1701861	1	2	1	2	2	1	2	2	2	2	1	14	1	1	4	1
1602325	1	2	1	2	2	1	2	1	2	2	1	13	1	1	4	0
1702450	1	2	1	2	2	2	2	2	2	2	2	16	1	1	4	0
2017093	1	2	1	2	2	1	2	2	2	2	2	15	1	1	4	1
2017054	1	2	1	2	2	1	2	2	2	2	2	15	1	1	4	0
1703492	1	2	1	2	2	1	2	2	2	2	1	14	1	1	4	0
2017257	1	2	1	2	2	1	2	2	2	2	2	15	1	1	4	0
1703214	1	2	1	1	2	2	2	1	2	2	1	13	1	1	4	1
1701035	1	2	1	2	2	1	2	1	2	2	2	14	1	1	4	0
1703954	1	2	1	2	2	2	2	2	2	2	1	15	1	1	4	0
1702349	1	2	1	2	2	1	2	2	2	2	2	15	1	1	4	0
1703102	1	2	1	0	1	1	1	2	2	2	2	11	1	1	4	0
1704132	1	2	1	2	2	1	2	2	2	2	2	15	1	1	4	0
20180295	1	1	1	1	1	1	2	1	2	1	0	9	2	0	4	1
1704642	1	1	2	2	2	1	2	2	2	1	0	12	1	0	4	0
2017090	1	2	2	2	2	1	2	2	2	0	1	12	1	0	4	0
1701234	1	1	2	2	2	1	2	2	2	1	1	13	1	0	4	0
1702108	1	1	2	2	2	1	2	2	2	1	1	13	1	0	4	1
1701434	1	1	2	2	2	2	2	2	2	2	2	16	1	1	4	0
2017089	1	1	2	1	2	0	1	2	2	2	2	12	1	1	4	0
2017078	1	1	2	2	2	2	2	2	2	2	2	16	1	1	4	0
20180404	1	1	2	2	2	2	1	2	2	2	1	14	1	1	4	3
20171818	1	1	2	1	0	1	1	2	2	2	1	10	1	1	4	1
20172929	1	1	2	0	2	1	1	0	2	2	1	9	1	1	4	1
20172222	1	1	2	2	2	1	2	2	2	2	2	15	1	1	4	0
201809136	1	1	2	2	2	1	1	2	2	2	2	14	1	1	4	0
1704394	1	2	2	2	2	2	2	2	2	1	2	15	1	0	4	0
1701185	1	2	2	2	2	2	2	2	2	2	2	16	1	1	4	0
1701926	1	2	2	2	2	2	2	2	2	2	2	16	1	1	4	0
1707209	1	2	2	1	2	1	2	2	2	2	2	14	1	1	4	0
1702081	1	2	2	2	2	2	2	2	2	2	1	15	1	1	4	0
2017108	1	1	2	2	2	1	2	2	2	1	0	12	2	0	4	0
2017171	1	2	2	2	2	0	1	2	2	1	0	10	2	0	4	0
2017218	1	1	2	1	2	0	2	2	2	0	0	9	2	0	4	0
201815168	1	1	1	0	1	1	1	2	0	1	1	7	1	0	3	0
1624315	2	1	1	0	2	1	2	1	0	2	1	9	1	1	5	0
1701309	5	1	2	0	0	0	1	2	0	2	2	7	1	1	2	1
1701682	1	2	1	1	0	1	2	2	1	2	2	11	1	1	4	1
1612195	1	1	1	1	2	2	2	2	1	1	1	12	1	0	2	0
1702357	1	1	1	1	1	0	1	2	1	2	2	10	1	1	2	0
1701872	1	1	1	0	2	1	2	2	1	2	2	12	1	1	5	0
1718097	3	1	1	1	2	1	2	2	1	2	2	13	1	1	4	0
1701083	1	2	1	1	2	0	2	2	1	1	0	9	1	0	2	1
2017228	1	2	1	2	1	1	1	2	1	2	1	11	1	1	5	0
1701966	1	1	2	0	2	1	2	2	1	1	2	11	1	0	3	0
20184092	1	1	2	0	2	1	1	1	1	1	1	8	1	0	3	1
2017066	4	1	2	1	2	1	2	2	1	2	2	13	1	1	5	0
1701059	1	1	1	0	2	1	2	2	2	2	2	13	1	1	4	1
1701933	1	1	1	2	2	1	2	1	2	2	2	14	1	1	1	3
1701519	1	1	1	2	2	2	2	2	2	2	1	15	1	1	1	1
20181466	1	2	1	2	2	1	2	2	2	1	0	12	1	0	2	0
1702552	1	1	1	2	2	1	2	2	2	1	1	13	1	0	1	0
1702123	1	1	1	0	2	1	2	2	2	0	0	9	1	0	3	0
1700873	1	1	1	1	2	1	2	2	2	0	0	10	1	0	4	0
1701246	1	1	1	1	2	1	0	2	2	1	1	10	1	0	2	0
1704523	1	1	1	2	2	1	2	2	2	0	2	13	1	0	1	0
1703769	1	1	1	2	2	1	2	2	2	1	1	13	1	0	1	3
1703742	1	1	1	2	2	1	2	2	2	1	1	13	1	0	4	1
1703657	1	1	1	1	1	1	0	2	2	0	1	8	1	0	3	1
1703580	1	1	1	1	2	0	2	2	2	0	1	10	1	0	3	0
1704197	1	1	1	1	2	1	2	2	2	1	1	12	1	0	2	0
2017058	1	1	1	2	1	1	2	0	2	1	1	10	1	0	2	1
2017258	1	1	1	2	2	2	2	2	2	1	0	13	1	0	1	0
1702608	1	1	1	1	1	2	2	1	2	1	2	12	1	0	1	0
1700217	1	1	1	2	2	1	2	2	2	1	2	14	1	0	2	0
1700231	1	1	1	2	2	1	2	2	2	1	1	13	1	0	2	0
1701269	1	1	1	2	2	1	2	2	2	1	2	14	1	0	2	0
1702163	1	1	1	2	2	1	1	2	2	0	0	10	1	0	2	0
1702225	1	1	1	0	2	1	1	2	2	0	0	8	1	0	3	0
1703897	1	1	1	2	2	1	2	2	2	1	0	12	1	0	1	0
1703878	1	1	1	1	2	1	2	2	2	1	1	12	1	0	1	0
201879514	1	1	1	2	2	2	2	2	2	1	1	12	1	0	1	3
201811164	1	1	1	1	2	2	2	2	2	1	1	13	1	0	1	0
1702285	1	1	1	2	2	2	2	2	2	2	1	15	1	1	1	1
1702062	1	1	1	2	2	2	2	2	2	2	2	16	1	1	1	0
1702207	1	1	1	2	2	2	2	2	2	2	2	16	1	1	1	1
1701761	1	1	1	2	2	1	2	2	2	2	2	15	1	1	1	0
1701730	1	1	1	2	2	2	2	2	2	2	2	16	1	1	1	0
1701493	1	1	1	2	2	2	2	2	2	2	2	16	1	1	5	0
1701721	1	1	1	2	2	1	2	2	2	2	2	15	1	1	5	1
1700954	1	1	1	2	2	1	2	1	2	2	2	14	1	1	5	0
1701285	1	1	1	1	2	1	2	1	2	2	2	13	1	1	1	0
1701384	1	1	1	2	2	1	2	2	2	2	2	15	1	1	5	0
1701033	1	1	1	2	2	1	2	2	2	2	2	15	1	1	5	0
1701329	1	1	1	2	2	2	2	2	2	2	2	16	1	1	5	0
1703797	1	1	1	2	2	1	2	2	2	2	2	15	1	1	2	0
1701240	1	1	1	2	2	1	2	1	2	2	1	13	1	1	5	0
1701466	1	1	1	2	2	2	2	2	2	2	2	16	1	1	5	0
1702563	1	1	1	2	2	1	2	2	2	2	2	15	1	1	5	1
1704604	1	1	1	2	2	1	2	2	2	2	2	15	1	1	5	1
1704691	1	1	1	2	2	1	2	2	2	2	2	15	1	1	1	0
1704127	1	1	1	2	2	1	2	2	2	2	2	15	1	1	5	0
1703492	1	1	1	1	2	0	2	2	2	2	2	13	1	1	5	0
1718256	1	1	1	2	2	1	2	2	2	2	2	15	1	1	5	0
1718079	3	1	1	2	2	2	2	2	2	2	2	16	1	1	1	0
1723124	2	1	1	2	2	1	2	2	2	2	2	15	1	1	5	0
1718067	3	1	1	1	2	1	2	2	2	2	2	14	1	1	5	1
1718056	2	1	1	2	2	1	2	2	2	2	2	15	1	1	5	0
1718087	2	1	1	2	2	2	2	2	2	2	2	16	1	1	1	0
1718183	3	1	1	2	2	1	2	2	2	2	1	14	1	1	5	0
1702627	2	1	1	2	2	1	2	2	2	2	2	15	1	1	5	0
1701153	3	1	1	2	2	2	2	2	2	2	2	16	1	1	1	0
1701337	2	1	1	2	2	1	2	2	2	2	2	15	1	1	5	1
1702429	2	1	1	1	2	1	2	2	2	2	2	14	1	1	5	0
201803156	2	1	1	2	2	1	2	2	2	2	2	15	1	1	5	1
1703101	1	2	1	2	2	1	2	2	2	1	1	13	1	0	5	0
1701728	1	2	1	2	2	1	2	2	2	1	1	13	1	0	5	0
1702598	1	2	1	2	2	1	1	1	2	1	0	10	1	0	2	0
1702660	1	2	1	2	2	2	2	2	2	1	1	14	1	0	5	0
1702599	1	2	1	2	2	1	2	2	2	1	1	13	1	0	5	0
1701171	1	2	1	2	2	0	2	1	2	1	1	11	1	0	5	1
1704152	1	2	1	2	2	1	2	2	2	1	1	13	1	0	5	0
1718134	1	2	1	2	2	2	2	1	2	1	1	13	1	0	1	0
201829182	1	2	1	2	2	2	2	2	2	1	1	14	1	0	5	0
2017083	1	2	1	2	2	2	2	2	2	2	2	16	1	1	5	0
2017073	1	2	1	1	2	1	2	2	2	2	2	14	1	1	5	0
2017113	1	2	1	2	2	1	2	2	2	2	1	14	1	1	5	0
2017136	1	2	1	2	2	1	2	2	2	2	2	15	1	1	1	1
2017052	1	2	1	2	2	1	2	2	2	2	2	15	1	1	5	0
2017249	1	2	1	2	2	2	2	2	2	2	2	16	1	1	5	1
2017169	1	2	1	2	2	1	1	1	2	2	1	12	1	1	5	0
2017259	1	2	1	2	2	1	2	1	2	2	2	14	1	1	2	0
2017251	1	2	1	2	1	2	2	2	2	2	2	15	1	1	5	1
2017274	1	2	1	2	2	1	2	2	2	2	2	15	1	1	5	0
2017266	1	2	1	2	2	1	2	2	2	2	2	15	1	1	2	0
2017167	1	2	1	1	1	1	1	2	2	2	1	11	1	1	5	0
20175278	1	2	1	2	2	1	2	1	2	2	1	13	1	1	5	0
2017226	2	2	2	2	2	1	2	2	2	1	2	14	1	0	5	0
17017091	1	1	2	2	2	1	2	2	2	1	1	13	1	0	5	0
1701981	1	1	2	0	2	1	2	2	2	0	1	10	1	0	3	0
17012601	1	1	2	2	2	2	2	2	2	1	1	14	1	0	5	0
1701150	1	1	2	2	2	1	2	2	2	1	2	14	1	0	2	1
1700977	2	1	2	2	2	1	2	1	2	1	1	12	1	0	5	0
1700395	1	1	2	2	2	1	2	1	2	1	0	11	1	0	5	1
1701049	2	1	2	2	2	1	2	1	2	1	2	13	1	0	2	1
201816109	4	1	2	1	1	2	2	2	2	1	1	12	1	0	5	1
201814107	1	1	2	1	2	2	2	2	2	1	1	13	1	0	5	0
20180598	1	1	2	2	2	1	2	2	2	1	0	12	1	0	5	0
201819112	1	1	2	2	2	2	2	2	2	1	1	14	1	0	2	1
20172324	1	1	2	0	2	2	2	2	2	1	1	12	1	0	5	0
1701553	1	1	2	2	2	2	2	1	2	2	2	15	1	1	5	0
1701624	2	1	2	2	2	2	2	2	2	2	1	15	1	1	5	0
1702207	3	1	2	2	2	2	2	2	2	2	2	16	1	1	5	0
1702052	8	1	2	2	2	1	2	2	2	2	2	15	1	1	2	0
1723134	4	1	2	2	2	1	2	2	2	2	2	15	1	1	5	0
2017060	3	1	2	1	2	1	2	2	2	2	2	14	1	1	5	0
2017016	6	1	2	2	2	2	2	2	2	2	2	16	1	1	5	0
2017057	3	1	2	2	2	1	2	2	2	2	2	15	1	1	5	0
2017086	6	1	2	2	2	2	2	2	2	2	2	16	1	1	5	1
2017082	3	1	2	2	2	1	2	2	2	2	1	14	1	1	5	3
2017105	4	1	2	2	2	2	2	2	2	2	2	16	1	1	5	1
2017132	6	1	2	1	2	2	2	2	2	2	2	15	1	1	5	0
2017239	2	1	2	2	2	1	2	1	2	2	2	14	1	1	5	0
1701722	1	2	2	2	2	1	2	2	2	1	0	12	2	0	2	0
